# Supplementary material
Source: MDPI journal article supplement (https://www.mdpi.com/1999-4907/12/1/81)
Supplement: s1 [file s1]

## Supporting information

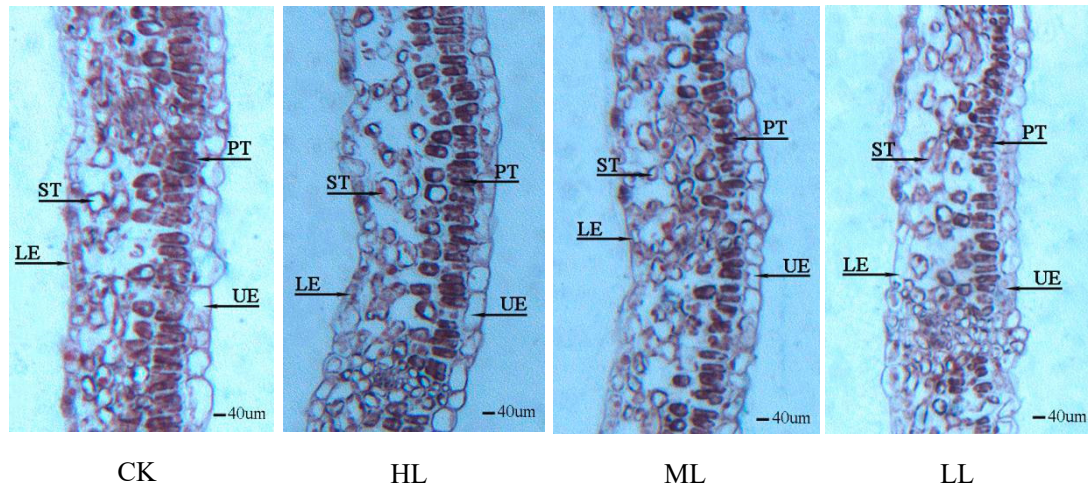

**Figure S1.** The anatomical structure of *J. regia* f. *luodianense* seedlings leaves under different light intensities. PT:Palisade tissue, ST:Spongy tissue, UE:Upper-epidermis, LE: Lower-epidermis. CK: 100% full light treatment; HL: 75% full light treatment; ML: 50% full light treatment; LL: 25% full light treatment.
